# Supplementary material
Source: PubMed Central journal article supplement (PMC4558663)
Supplement: supp_tpc.114.135095_tpc135095_SupplementalData.pdf [file supp_tpc.114.135095_tpc135095_SupplementalData.pdf]

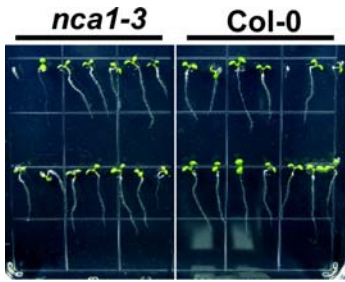

**Supplemental Figure 1.** Growth of five-day-old *nca1-3* seedlings is similar to that in Col-0 seedlings.

Col-0 and *nca1-3* seeds were germinated on, and seedlings grown on, MS medium at pH 5.8. Photographs were taken five days after seeds were sown.

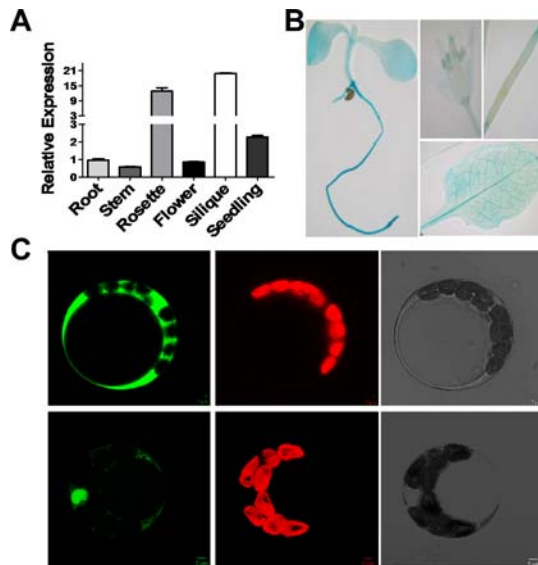

**Supplemental Figure 2.** *NCA1* gene expression and protein localization.

- A.** Analysis of *NCA1* expression in roots, stems, rosette leaves, flowers, siliques, and 10-day-old seedlings. Real-time PCR analysis with *TUBULIN* as the internal control. Error bars represent SD (n=3) for at least three replicate experiments.
- B.** *NCA1* promoter-*GUS* expression in Col-0 seedlings, leaves, flowers, and siliques.
- C.** Subcellular localization of NCA1 in protoplasts. *Pro35S:NCA1-GFP* construct was transformed into *Arabidopsis* protoplasts and GFP fluorescence was monitored with a Zeiss confocal microscope. Top row, *Pro35S:NCA1-GFP*; bottom row, *Pro35S:GFP*. In each row, left panel, GFP; middle panel, autofluorescence; right panel, bright field image.

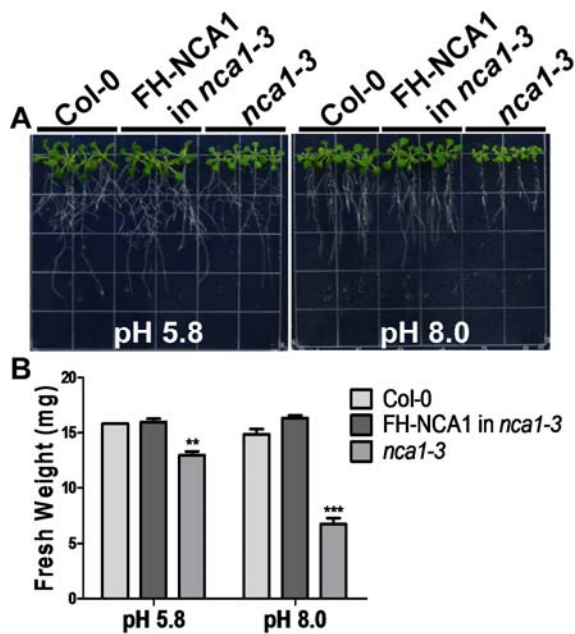

**Supplemental Figure 3.** *Flag-HA-NCA1* rescues the *nca1-3* phenotype.

- A.** The phenotype of the *nca1-3* mutant is rescued in *Pro35S:3×Flag-HA-NCA1* (*FH-NCA1*) transgenic plants in the *nca1-3* background. Five-day-old seedlings of Col-0, *nca1-3*, and the *nca1-3* mutant expressing FH-NCA1 from seeds sown on MS medium at pH 5.8 were transferred to MS medium at pH 5.8 or pH 8.0. Photographs were taken 10 days after transfer.
- B.** Fresh weight of Col-0, *nca1-3* and *nca1-3* seedlings expressing FH-NCA1. Data represent means  $\pm$ SD of at least three replicate experiments. Statistical significance is based on a Student's t test in comparison to Col-0 values. (\*\* $P < 0.01$  and \*\*\* $P < 0.001$ ).

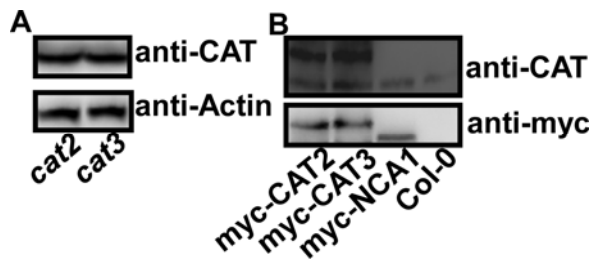

**Supplemental Figure 4.** Analysis of anti-CAT antibody specificity.

- A.** Analysis of anti-CAT antibody specificity in the *cat2* and *cat3* mutants. Total protein was extracted from 10-day-old seedlings and analyzed by immunoblot analysis with anti-CAT and anti-Actin (used as a loading control) antibodies.
- B.** Analysis of anti-CAT antibody specificity in Col-0 expressing *Pro35S:6Myc-NCA1*, *Pro35S:6Myc-CAT2*, or *Pro35S:6Myc-CAT3*. Total protein was extracted from 10-day-old seedlings and analyzed with anti-CAT and anti-Myc (used to mark Myc-labeled protein) antibodies.

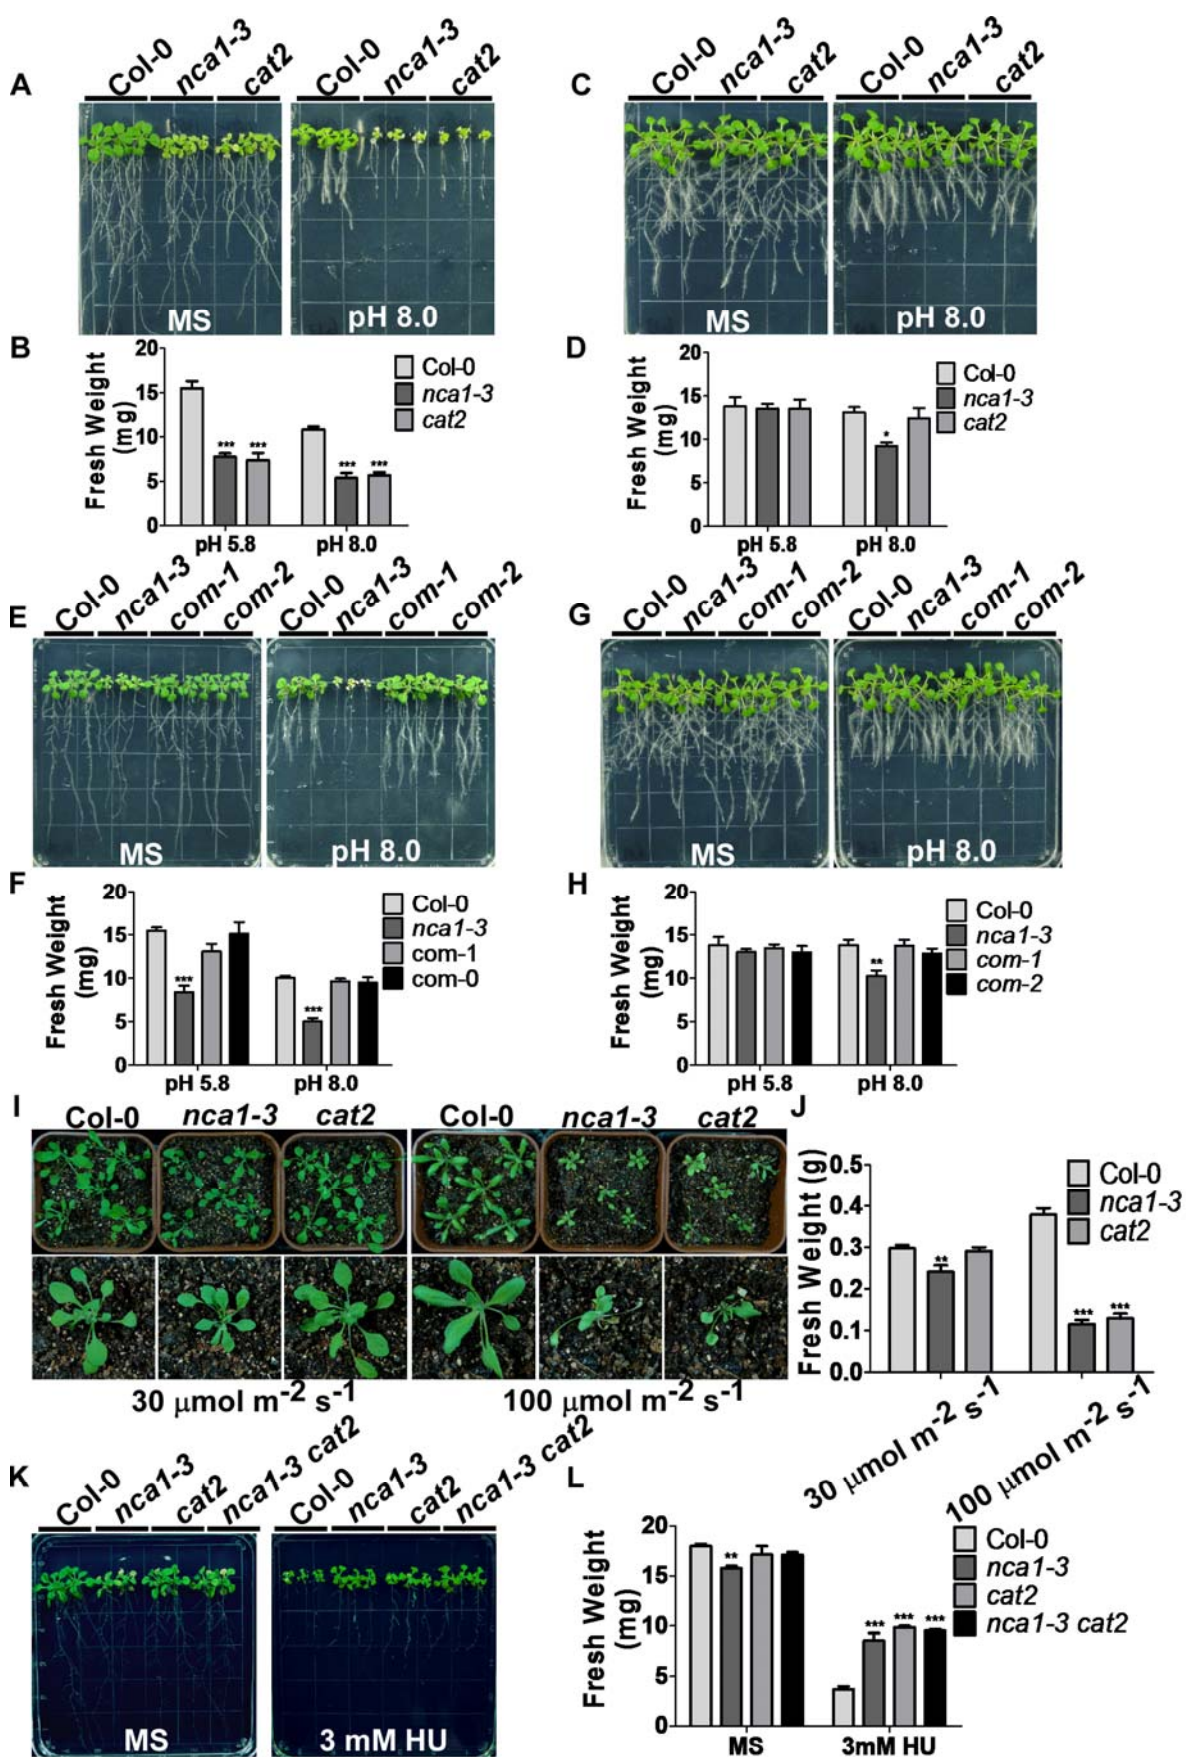

**Supplemental Figure 5.** NCA1 genetically interacts with CAT2.

- A.** Analysis of alkaline sensitivity in air under an irradiance of  $90 \mu\text{mol m}^{-2} \text{s}^{-1}$  in Col-0, *ncal-3*, and *cat2* seedlings. Five-day-old seedlings of Col-0, *ncal-3*, and *cat2* from seeds germinated on MS medium at pH 5.8 were transferred to MS medium at pH 5.8 or pH 8.0. Photographs were taken 10 days after transfer.
- B.** Fresh weight of Col-0, *ncal-3*, and *cat2* seedlings in **A**. Data represent means  $\pm$ SD of at least three replicate experiments. Statistical significance is based on a Student's t test (\*\*P<0.01).
- C.** Analysis of alkaline sensitivity in the presence of 3,000 ppm CO<sub>2</sub> under an irradiance of  $90 \mu\text{mol m}^{-2} \text{s}^{-1}$  in Col-0, *ncal-3*, and *cat2* seedlings. Five-day-old seedlings of Col-0, *ncal-3*, and *cat2* from seeds germinated on MS medium at pH 5.8 were transferred to MS medium at pH 5.8 or pH 8.0. Photographs were taken 10 days after transfer.
- D.** Fresh weight of Col-0, *ncal-3*, and *cat2* seedlings in **C**. Data represent means  $\pm$ SD of at least three replicate experiments. Statistical significance is based on a Student's t test (\*P<0.05).
- E.** Analysis of alkaline sensitivity in air under an irradiance of  $90 \mu\text{mol m}^{-2} \text{s}^{-1}$  in Col-0, *ncal-3*, *com-1*, and *com-2* seedlings. Five-day-old seedlings of Col-0, *ncal-3*, *com-1*, and *com-2* from seeds germinated on MS medium at pH 5.8 were transferred to MS medium at pH 5.8 or pH 8.0. Photographs were taken 10 d after transfer.
- F.** Fresh weight of Col-0, *ncal-3*, *com-1*, and *com-2* seedlings in **E**. Data represent means  $\pm$ SD of at least three replicate experiments. Statistical significance is based on a Student's t test (\*\*P<0.01).
- G.** Analysis of alkaline sensitivity in 3,000 ppm CO<sub>2</sub> under an irradiance of  $90 \mu\text{mol m}^{-2} \text{s}^{-1}$  in Col-0, *ncal-3*, *com-1*, and *com-2* seedlings. Five-day-old seedlings of Col-0, *ncal-3*, *com-1*, and *com-2* from seeds germinated on MS medium at pH 5.8 were transferred to MS medium at pH 5.8 or pH 8.0. Photographs were taken 10 days after transfer.
- H.** Fresh weight of Col-0, *ncal-3*, *com-1*, and *com-2* seedlings in **G**. Data represent means  $\pm$ SD of at least three replicate experiments. Statistical significance is based on a Student's t test (\*\*P<0.01).
- I.** Analysis of the effect of different irradiances on *ncal-3* in soil. Seeds of Col-0, *cat2*, and *ncal-3* were sown in soil. Germination and growth were carried out in chambers with irradiances of  $30 \mu\text{mol m}^{-2} \text{s}^{-1}$  or  $100 \mu\text{mol m}^{-2} \text{s}^{-1}$ , respectively and with a 16 h photoperiod. Photographs were taken 4 weeks after seeds were sown.
- J.** Fresh weight of Col-0, *cat2*, and *ncal-3* in **I**. Data represent means  $\pm$ SD of at least three replicate experiments. Statistical significance is based on a Student's t test (\*P<0.05, and \*\*P<0.01).
- K.** Analysis of hydroxyurea (HU) tolerance in Col-0, *ncal-3*, *cat2*, and the *ncal-3 cat2* double mutant. Five-day-old seedlings of Col-0, *ncal-3*, *cat2*, and *ncal-3 cat2* from seeds germinated on MS medium at pH 5.8 were transferred to MS medium at pH 5.8 without or with 3 mM HU. Photographs were taken 10 d after

transfer.

- L.** Fresh weight of Col-0, *nca1-3*, *cat2*, and *nca1-3 cat2* seedlings in **K**. Data represent means  $\pm$ SD of at least three replicate experiments. Statistical significance is based on a Student's t test (\*\*P<0.01 and \*\*\*P<0.001).

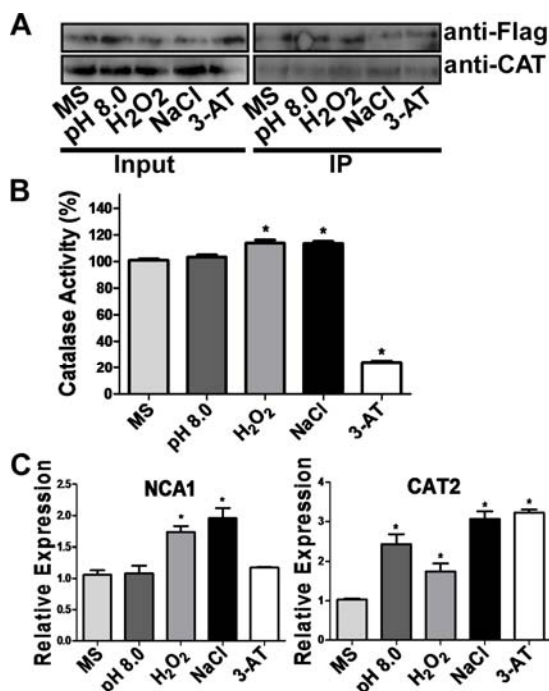

**Supplemental Figure 6.** Increase of catalase activity is not affected by alkaline stress.

**A.** Analysis of the interaction between NCA1 and catalases during stresses.

*Pro35S:3×Flag-HA-NCA1* plasmids were introduced into Col-0 and transgenic plants were generated. Ten-day-old transgenic plants were treated with liquid MS medium at pH 5.8, pH 8.0, or liquid MS medium at pH 5.8 containing 20 mM H<sub>2</sub>O<sub>2</sub>, 150 mM NaCl, or 20 mM 3-AT for 3 hours. Flag-HA-NCA1 was immunoprecipitated with anti-Flag agarose and analyzed by immunoblot analysis with anti-Flag antibody to detect Flag-HA-NCA1 and with anti-CAT antibody to detect catalases in the precipitates.

**B.** Catalase activity assay of seedlings treated with liquid MS medium at pH 5.8, pH 8.0, or liquid MS medium at pH 5.8 containing 20 mM H<sub>2</sub>O<sub>2</sub>, 150 mM NaCl or 20 mM 3-AT for 3 hours. Catalase activity is indicated in units (U)/mg protein and all activities were calculated relative to the activity of seedlings treated with MS medium at pH 5.8 (80 U/mg). Data represent means ±SD of at least three replicate experiments.

**C.** Analysis of *NCA1* and *CAT2* expression in 10-d-old Col-0 seedlings treated with liquid MS medium at pH 5.8, pH 8.0, or liquid MS medium at pH 5.8 containing 20 mM H<sub>2</sub>O<sub>2</sub>, 150 mM NaCl, or 20 mM 3-AT for 3 h. Real-time PCR analysis was performed with *TUBULIN* as an internal control. Error bars represent SD (n=3) for at least three replicate experiments.



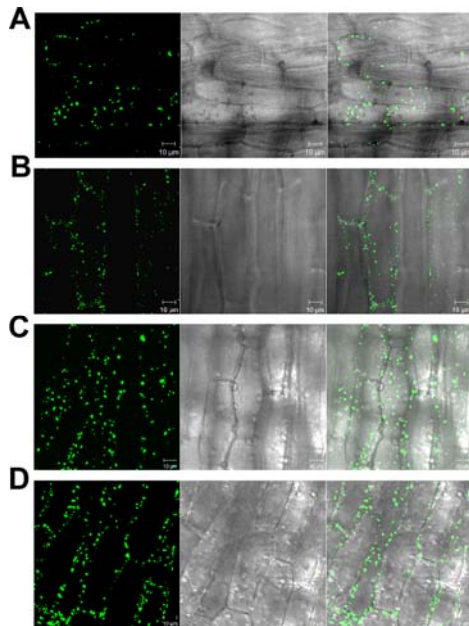

**Supplemental Figure 7.** NCA1 does not affect the subcellular localization of catalase.

- A.** Subcellular localization of CAT2 in the hypocotyl of Col-0 seedlings.  
*Pro35S:GFP-CAT2* plasmids were introduced into Col-0 and transgenic plants were generated. Images were collected with a Zeiss confocal microscope. Left panels, GFP; middle panels, bright field image; right panels, merged images.
- B.** Subcellular localization of CAT2 in the hypocotyl of *nca1-3* seedlings.  
*Pro35S:GFP-CAT2* plasmids were introduced into *nca1-3* and transgenic plants were generated. Images were collected with a Zeiss confocal microscope. Left panels, GFP; middle panels, bright field image; right panels, merged images.
- C.** Subcellular localization of CAT3 in the hypocotyl of Col-0 seedlings.
- D.** Subcellular localization of CAT3 in the hypocotyl of *nca1-3* seedlings.

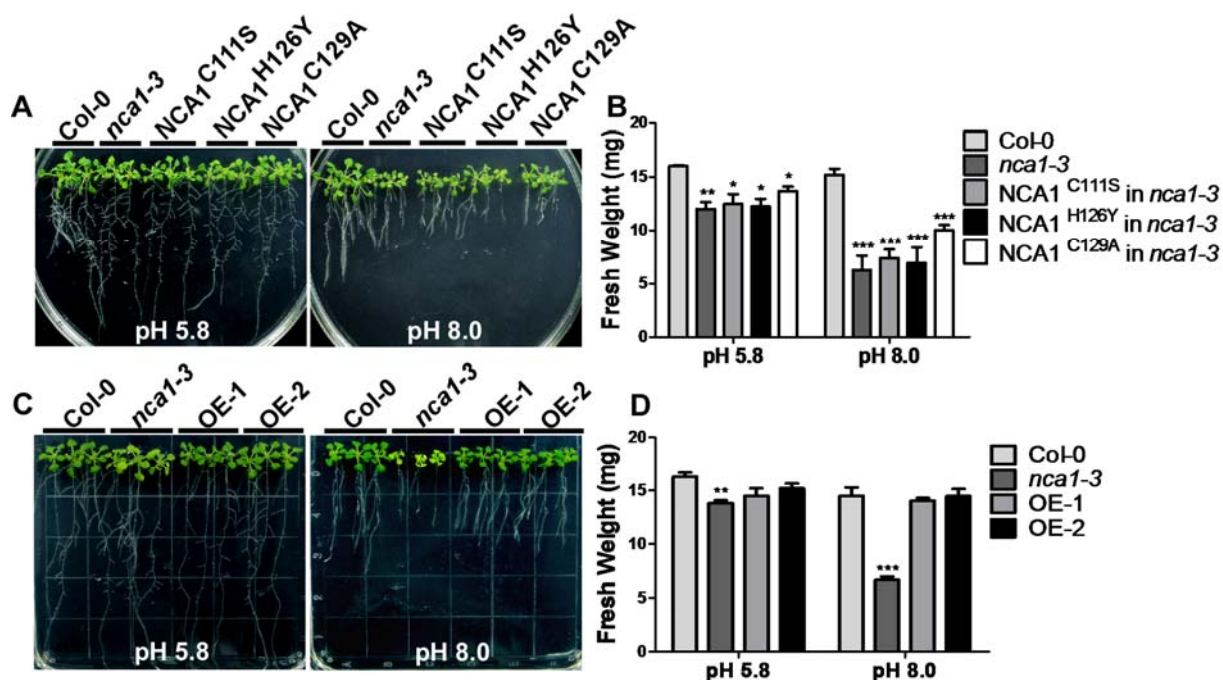

**Supplemental Figure 8.** The RING-finger domain of NCA1 is required for seedling tolerance of high pH.

- A.** Analysis of tolerance of high pH in transgenic T<sub>3</sub> *nca1-3* plants harboring *Pro35S:myc-NCA1<sup>C111S</sup>*, *Pro35S:myc-NCA1<sup>H126Y</sup>*, or *Pro35S:myc-NCA1<sup>C129A</sup>*. Five-day-old seedlings from seeds germinated on MS medium at pH 5.8 were transferred to MS medium at pH 5.8 or 8.0. Photographs were taken 10 d after transfer.
- B.** Fresh weight of Col-0, *nca1-3* and *nca1-3* seedlings harboring *Pro35S:myc-NCA1<sup>C111S</sup>*, *Pro35S:myc-NCA1<sup>H126Y</sup>*, or *Pro35S:myc-NCA1<sup>C129A</sup>*. Data represent means  $\pm$ SD of at least three replicate experiments. Statistical significance is based on a Student's t test (\*P<0.05, \*\*P<0.01 and \*\*\*P<0.001).
- C.** Analysis of tolerance of high pH in transgenic T<sub>3</sub> *nca1-3* plants harboring *Pro35S:myc-NCA1* (OE-1 and OE-2). Five-day-old seedlings from seeds germinated on MS medium at pH 5.8 were transferred to MS medium at pH 5.8 or 8.0. Photographs were taken 10 d after transfer.
- D.** Fresh weight of Col-0, *nca1-3*, and transgenic T<sub>3</sub> *nca1-3* seedlings harboring *Pro35S:myc-NCA1*. Data represent means  $\pm$ SD of at least three replicate experiments. Statistical significance is based on a Student's t test (\*\*P<0.01 and \*\*\*P<0.001).

**Supplemental Table 1. Primers for plasmid construction**

|                                 |                                   |
|---------------------------------|-----------------------------------|
| Genomic-F                       | GGAATTCGAGCTCGGGTTCAACTGGTTATGAC  |
| Genomic-R                       | CGGGATCCGATTACATGGGAGGATAGTAC     |
| NCA1-gF                         | GACGAAGATCTACAAGCTG               |
| NCA1-gR                         | GTAGCCAGTTCAGCTAACC               |
| Promoter-F                      | GGAATTCGAGCTCGGGTTCAACTGGTTATGAC  |
| Promoter-R                      | CGGGATCCTCGTGAAGGTAGCAACAAC       |
| NCA1-F                          | TTGGCGCGCCATGACGACGACTTCTGTTTGCC  |
| NCA1-R                          | CCTTAATTAATTAGAGTGCAGTTTCAGCATCGG |
| NCA1-BamHI-F                    | CGGGATCCATGACGACGACTTCTGTTTGCC    |
| NCA1-BamHI-R                    | CGGGATCCTTAGAGTGCAGTTTCAGCATC     |
| NCA1-AscI-F                     | TTGGCGCGCCATGACGACGACTTCTGTTTGCC  |
| NCA1-PacI-R                     | CCTTAATTAATTAGAGTGCAGTTTCAGCATCGG |
| NCA1-SpeI-F                     | GGACTAGTATGACGACGACTTCTGTTTGCC    |
| NCA1-SpeI-R                     | GGACTAGTTTAGAGTGCAGTTTCAGCATC     |
| NCA1 <sup>C111S</sup> -F        | GCTGTATGTTAAGTCAAGCAC             |
| NCA1 <sup>C111S</sup> -R        | GTGCTTGACTTAACATACAG              |
| NCA1 <sup>H126Y</sup> -F        | CCTTGCACATATGTGTTCTG              |
| NCA1 <sup>H126Y</sup> -R        | GCAGAACACATATGTGCAAG              |
| NCA1 <sup>C129A</sup> -F        | GCCTTGCACACATGTGTTTCGGCAAAGTATGC  |
| NCA1 <sup>C129A</sup> -R        | GTGTGCAAGGCACACATCTACTGCTC        |
| NCA1 <sup>27-405</sup> -NdeI-F  | ATTCATATGACCGCTTCTGGTTGTCTT       |
| NCA1 <sup>158-405</sup> -NdeI-F | ATTCATATGGTTGATCAATTTATTGAAGGC    |
| NCA1 <sup>185-405</sup> -NdeI-F | ATTCATATGGATAACAAAAAAGTGATTTAC    |
| NCA1 <sup>405</sup> -AccI-R     | ATTGTCGACTTAGAGTGCAGTTTCAGC       |
| CAT2-AscI-F                     | TTGGCGCGCCATGGATCCTTACAAGTATCG    |
| CAT2-PacI-R                     | CCTTAATTAATTAGATGCTTGGTCTCACG     |
| CAT3-AscI-F                     | TTGGCGCGCCATGGATCCTTACAAGTATCG    |
| CAT3-PacI-R                     | CCTTAATTAAGTAGATGCTTGGCCTCA       |

|             |                              |
|-------------|------------------------------|
| CAT2-XbaI-F | GCTCTAGAATGGATCCTTACAAGTATCG |
| CAT2-SalI-R | GCGTCGACTTAGATGCTTGGTCTCACG  |
| CAT3-XbaI-F | GCTCTAGAATGGATCCTTACAAGTATCG |
| CAT3-SalI-R | GCGTCGACCTAGATGCTTGGCCTCA    |

**Supplemental Table 2. Primers for RT-PCR**

|           |                        |
|-----------|------------------------|
| NCA1 RT-F | GACGAAGATCTACAAGCTG    |
| NCA1 RT-R | CTATATCCGCAACTTTGGC    |
| CAT2 RT-F | CCTTCTTGAGGATTACCATC   |
| CAT2 RT-R | GTCCAACAGGTTGAAGAG     |
| CAT3 RT-F | GGATCTCAACACTCTCAC     |
| CAT3 RT-R | TTAGTGGCGTGGCTGTGATTGG |
| ACTIN-F   | GTCGTACAACCGGTATTGTG   |
| ACTIN-R   | GAGCTGGTCTTTGAGGTTTC   |
